# Supplementary material for: Delirium Phenotype by Age and Sex in a Pooled Data Set of Adult Patients
Source: Atypon-hosted journal article supplement (doi:10.1176/appi.neuropsych.18020024), 2018-07-26

**Supplemental Figure 1.** Scree plots for the eigenvalues of the first five components (factors) from the delirium characteristics measured by the DRS-R98. According to age (A, B) and sex (C, D), and when controlling for sex and active diagnosis (E, F), and for age and active diagnosis (G, H). Note that the inflection points are in the second component for almost all groups, except for E, G, and H where the inflection occurs in the third or between the second and the third component.

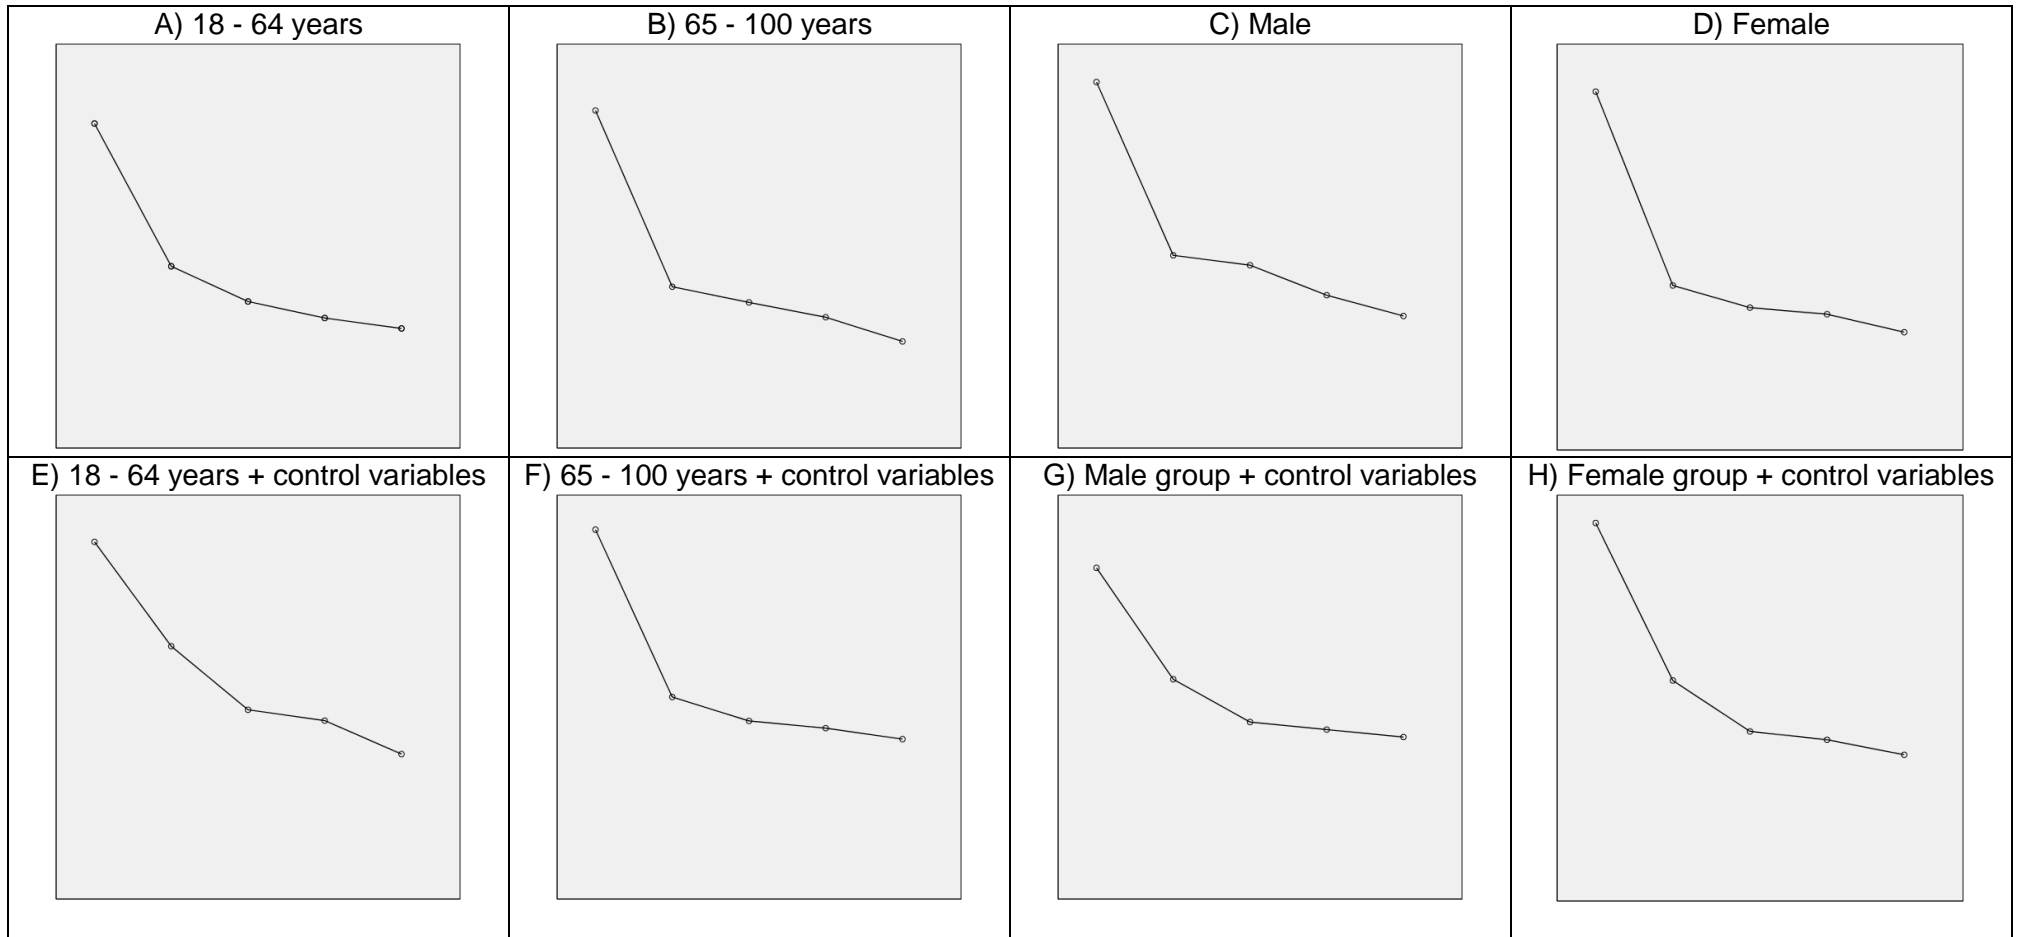

Supplement: appi.neuropsych.18020024.ds001.pdf [file appi.neuropsych.18020024.ds001.pdf]
